# Supplementary material for: EMTReK: An Evidence-based Model for the Transfer & Exchange of Research Knowledge—Five Case Studies in Palliative Care
Source: PubMed Central journal article supplement — SAGE Open Nurs. 2019 Jul 26;5:2377960819861854. doi: 10.1177/2377960819861854 (PMC7774354; doi:10.1177/2377960819861854), 2019-07-26
Supplement: Supplemental_Material.pdf [file Supplemental_Material.pdf]

Supplementary Table 1. Checklist based on O'Brien et al's **Standards for Reporting**

**Qualitative Research**

| <b>Title &amp; Abstract</b>                 | <b>Detail (from O'Brien et al)</b>                                                                                              | <b>Comment on Study</b>                                                                                        |
|---------------------------------------------|---------------------------------------------------------------------------------------------------------------------------------|----------------------------------------------------------------------------------------------------------------|
| Title                                       | Describes the nature/topic of the study. Identifies approach or methods used                                                    | Yes: Identified as a qualitative exploratory study in the title                                                |
| Abstract                                    | Summary of the study as required by target publication                                                                          | Yes                                                                                                            |
| <b>Introduction</b>                         |                                                                                                                                 |                                                                                                                |
| Problem formulation                         | Description and significance of the problem/phenomenon studied; review of relevant theory and empirical work; problem statement | Yes: Presented in Introduction                                                                                 |
| Purpose or research question                | Purpose, objectives or questions stated.                                                                                        | Yes: Study objectives stated at end of Introduction                                                            |
| <b>Methods</b>                              |                                                                                                                                 |                                                                                                                |
| Qualitative approach & research paradigm    | Specific approach and/or theory and research paradigm indicated                                                                 | Yes: A pragmatic approach to qualitative analysis was undertaken using the stages outlined by Braun and Clarke |
| Researcher characteristics and reflexivity  | Researchers' characteristics etc considered                                                                                     | Yes: Team composition and characteristics described within Methods.                                            |
| Context                                     | Setting/site and salient contextual factors; rationale <sup>b</sup>                                                             | Yes: Introduction considers the rationale for testing of the model within palliative care                      |
| Sampling strategy                           | Selection of research participants, documents, etc                                                                              | Yes: Case studies were chosen based on pre-determined selection criteria                                       |
| Ethical issues pertaining to human subjects | Approval by review board, participant consent, etc                                                                              | Yes: Ethical approval obtained from Ulster University and UCD                                                  |
| Data collection methods                     | Type of data, process of data collection procedures, etc                                                                        | Yes: Summarised in Method                                                                                      |
| Data collection instruments/technologies    | Description of any materials, etc                                                                                               | Yes: Summarised in Method                                                                                      |
| Units of study                              | Number/ details of participants, document, etc                                                                                  | Yes: Data arising from 5 projects. Noted in Results                                                            |
| Data processing                             | Details regarding processing of data                                                                                            | Yes: Summarised in Method                                                                                      |

|                                                          |                                                                                                                     |                                                                                                                                                            |
|----------------------------------------------------------|---------------------------------------------------------------------------------------------------------------------|------------------------------------------------------------------------------------------------------------------------------------------------------------|
| Data analysis                                            | Process of theme development, refinement etc.                                                                       | Yes: Summarised in Method                                                                                                                                  |
| Techniques to enhance trustworthiness                    | Checks to ensure credibility of analysis                                                                            | Yes: The credibility of the themes was tested by ensuring that the themes arising from interviews resonated with the data arising from other data sources. |
| <b>Results/ Findings</b>                                 |                                                                                                                     |                                                                                                                                                            |
| Synthesis and interpretation                             | Main findings                                                                                                       | Yes: 8 themes presented aligned to the interpretation, operationalisation and impact of EMTReK                                                             |
| Links to empirical data                                  | Evidence presented to support findings                                                                              | Yes: Direct quotes presented in findings                                                                                                                   |
| <b>Discussion</b>                                        |                                                                                                                     |                                                                                                                                                            |
| Integration, implications, transferability, contribution | Includes summary of findings, links to existing research literature, consideration of implications and contribution | Yes: Presented in the Discussion                                                                                                                           |
| Limitations                                              | Trustworthiness and limitations of findings                                                                         | Yes: Strengths and limitations discussed                                                                                                                   |
| <b>Other</b>                                             |                                                                                                                     |                                                                                                                                                            |
| Conflicts of interest                                    | Potential sources of influence or perceived influence on study conduct and conclusions; how these were managed      | Yes: Statement included                                                                                                                                    |
| Funding                                                  | Sources of funding and other support; role of funders in data collection, interpretation, and reporting             | Yes: Statement included                                                                                                                                    |

**Reference:**

O'Brien BC, Harris IB, Beckman TJ, Reed DA, Cook DA. **Standards for reporting qualitative research: a synthesis of recommendations.** *Academic Medicine*, Vol. 89, No. 9 / Sept 2014 DOI: 10.1097/ACM.0000000000000388
